# Supplementary material for: Niche Breadth Predicts Geographical Range Size and Northern Range Shift in European Dragonfly Species (Odonata)
Source: MDPI journal article supplement (doi:10.3390/d14090719), 2022-08-30
Supplement: s1 [file s1]

Archive with 1 entries (1 files):
- diversity-1849740-supplementary.pdf
