# Supplementary material for: Niche Breadth Predicts Geographical Range Size and Northern Range Shift in European Dragonfly Species (Odonata)
Source: MDPI journal article supplement (doi:10.3390/d14090719), 2022-08-30
Supplement: s1 [file s1 › diversity-1849740-supplementary.pdf]

## Article

# Niche Breadth Predicts Geographical Range Size and Northern Range Shift in European Dragonfly Species (Odonata)

Kent Olsen <sup>1,\*</sup>, Jens-Christian Svenning <sup>2,3,4</sup> and Henrik Balslev <sup>2</sup>

<sup>1</sup> Research and Collections, Natural History Museum Aarhus, Wilhelm Meyers Allé 10, DK-8000 Aarhus, Denmark

<sup>2</sup> Section for Ecoinformatics and Biodiversity, Department of Biology, Aarhus University, Ny Munkegade 116, DK-8000 Aarhus, Denmark

<sup>3</sup> Center for Biodiversity Dynamics in a Changing World, Department of Biology, Aarhus University, Ny Munkegade 116, DK-8000 Aarhus, Denmark

<sup>4</sup> Center for Sustainable Landscapes under Global Change, Department of Biology, Aarhus University, Nordre Ringgade 1, DK-8000 Aarhus, Denmark

\* Correspondence: kent@nathist.dk; Tel.: +45-40272030

## Supplementary Tables

**Table S1.** List of European dragonfly (Odonata) species which (1) have been excluded from the analysis, (2) where modifications to species range have been applied, (3) which have colonized Europe after 1988, and (4) with taxonomic and nomenclatural changes between 1988 and 2010. Nomenclature and taxonomy follow IUCN [48].

### 1) SPECIES WHICH HAVE BEEN EXCLUDED IN THE ANALYSIS

#### *Anax ephippiger*

An obligate Afro-tropical migrant which expands north with the seasonal monsoon fronts [47]. It has a huge range and reproduces only temporarily in the Palearctic (northern Africa, Europe, central and southern Asia). It does not occur annually in most of the European range.

#### *Anax immaculifrons*

No distribution map included in Askew [45], only in Dijkstra & Lewington [47] and Kalkman et al. [12]. Found in south Turkey, Cyprus, and the Greek islands of Rhodes, Kápathso and Ikaria.

#### *Anax junius*

Is a trans-Atlantic vagrant with no established European populations [47].

#### *Gomphus ubadschii*

*G. ubadschii* used to be considered a subspecies of *G. flavipes* and both were included in the same distribution map in Askew [45]. Within our study area it is only found in very restricted areas in the western half of Anatolia [12,47].

#### *Libellula pontica*

Only included with distribution maps in Dijkstra & Lewington [47], but not in Askew [45] and Kalkman et al. [12]. Found only in a small area within our study area in northern Turkey.

#### *Onychogomphus assimilis*

Only included with distribution maps in Dijkstra & Lewington [47], but not in Askew [45] and Kalkman et al. [12]. Found only in a small area within our study area in southern Turkey.

#### *Onychogomphus flexuosus*

Only included with distribution maps in Dijkstra & Lewington [47], but not in Askew [45] and Kalkman et al. [12]. Found only in a small area within our study area in southern Turkey.

#### ***Somatochlora borisi***

First discovered in 1999 and thus not included in Askew [45], and so far, found only in a very restricted area in the south-eastern Balkans [12,47].

## **2) SPECIES IN WHICH RANGE MAPS HAVE BEEN MODIFIED**

#### ***Aeshna subarctica***

A large part of Belarus was missing in the 2010 data. However, according to the map in Dijkstra & Lewington [47] this is erroneous, and that area has thus been added to the range of this species.

#### ***Aeshna viridis***

A large part of Belarus and the freshwater lake, Ladoga east of Saint Petersburg was missing in the 2010 data. However, according to the map in Dijkstra & Lewington [47] this is erroneous, and that area has thus been added to the range of this species.

#### ***Calopteryx xanthostoma***

Records from Sardinia included in Askew [45] are reported by Boudot et al. [72] to be erroneous and have thus been omitted from the analysis.

#### ***Ceriatron tenellum***

*C. georgifreyi* used to be considered a subspecies of *C. tenellum* and both taxa were thus included in the same distribution map in Askew [45]. Both are now considered good species and their ranges are not known to overlap [47]. Consequently, the range of *C. georgifreyi* per 1988 was removed from the original *C. tenellum* map.

#### ***Ceriatron georgifreyi***

*C. georgifreyi* used to be considered a subspecies of *C. tenellum* and both taxa were thus included in the same distribution map in Askew [45]. Both are now considered good species and their ranges are not known to overlap [47]. Consequently, the range of *C. georgifreyi* per 1988 was drawn based on the original *C. tenellum* map.

#### ***Chalcolestes viridis* / *Chalcolestes parvidens***

*C. parvidens* used to be considered a subspecies of *C. viridis* and both were included in the same distribution map in Askew [45]. Both are now considered good species and as their ranges are known to overlap substantially, the maps of both taxa per 2010 were combined in order to compare it with the 1988 maps which include both species in one map.

#### ***Coenagrion hylas***

The population in Germany went extinct in the mid-1960s whereas the population in western Austria remains [45,47]. The map from 1988 have been updated to include the Austrian range as it is mentioned within the text, but not specified in the map whereas the extinct population has been omitted.

#### ***Coenagrion intermedium***

Included in the same distribution map as *C. puella* in Askew [45], but as *C. intermedium* according to Dijkstra & Lewington [47] replaces *C. puella* in Crete and their distributions are not known to overlap, the range of *C. intermedium* per 1988 was drawn based on the original *C. puella* map.

#### ***Cordulegaster boltonii***

*C. trinacriae* used to be considered a subspecies of *C. boltonii* and was thus included in the same distribution map in 1988 [45]. Both are now considered good species and as their ranges are not known to overlap as *C. trinacriae* replaces *C. boltonii* in Italy south of Rome [47], the range of *C. trinacriae* was removed from the original *C. boltonii* map in 1988.

#### ***Cordulegaster helladica***

Three weakly differentiated subspecies have been described, namely *C. helladica helladica*, *C. h. buccholzi*, and *C. h. kastalia*. The ranges of all three subspecies are combined within one map in 2010 as *C. helladica*. Askew [45] presented *C. helladica* in the same distribution map as *C. picta*, but as their distributions are not known to overlap according to Dijkstra & Lewington [47], the range of *C. helladica* per 1988 was drawn based on the original *C. picta* map.

#### ***Cordulegaster picta***

Askew [45] presented *C. helladica* in the same distribution map as *C. picta*, but as their distributions are not known to overlap according to Dijkstra & Lewington [47], the range of *C. helladica* was removed from the original *C. picta* map in 1988.

#### ***Cordulegaster trinacriae***

Included in the same distribution map as *C. boltonii* in Askew [45], but as *C. trinacriae* replaces *C. boltonii* in Italy south of Rome [47], the range of *C. trinacriae* per 1988 was drawn from the original *C. boltonii* map.

#### ***Lestes sponsa***

Records from Crete, Andalusia and Maghreb included in Askew [45] are considered erroneous [72] and thus omitted from the map in 1988.

#### ***Libellula fulva***

A large part of Czech Republic and all of Belarus was missing in the 2010 data. However, according to Dijkstra & Lewington [47] this is erroneous and both areas have thus been added to the range of this species.

#### ***Onychogomphus forcipatus***

Three weakly differentiated subspecies have been described, namely *O. f. forcipatus*, *O. f. albotibialis*, and *O. f. unguiculatus* [47]. The ranges of all three subspecies have been combined in the 2010 map of *O. forcipatus*.

#### ***Orthetrum cancellatum***

A large part of Belarus was missing in the 2010 data. However, according to maps in Dijkstra & Lewington [47] this is erroneous, and that area has thus been added to the range of this species.

#### ***Orthetrum coerulescens* / *Orthetrum ramburii***

The southern ssp. *anceps* was once considered a good species, formerly called *O. ramburii* [45], but as intermediate individuals occur in large areas this seems unjustified, and they are thus considered to be two subspecies [47]. For the analysis, the two maps from 1988 where they were treated as separate species have been combined in order to allow a direct comparison to the distribution per 2010, which include both subspecies in one map.

#### ***Pantala flavescens***

Single records from Spain and France which were originally included in Askew [45] have been omitted as they are now believed to have been based on a misinterpretation of French literature by Aguesse [73]. The species is considered to be at least partly ship assisted in the west Mediterranean area [47].

#### ***Pyrrhosoma nymphula* / *Pyrrhosoma elisabethae***

*P. elisabethae* used to be considered a subspecies of *P. nymphula* [45]. For the analysis, in 2010 the ranges of the two taxa were combined in order to compare with the 1988 maps which include both species in one map. However, it makes very little difference, as compared to the large distribution of *P. nymphula*, *P. elisabethae* is currently known from only a small number of localities on the Peloponnese, Kérkira (Corfu) and southern Albania [47].

#### ***Sympetrum pedemontanum***

The distribution in 2010 included parts of the Baltic Sea and the Black Sea. These erroneous parts of the range were removed in the analysis by using the European coastline.

#### ***Sympetrum striolatum* / *Sympetrum nigrescens***

*S. nigrescens* from the Atlantic coast of Ireland, Scotland and Norway has been considered a good species [45], but molecular work has showed that the genetic distance between *S. striolatum* and *S. nigrescens* is small and fall in the range of within-species variation

[74]. The two maps from 1988 where they were treated as separate species have been combined in order to allow a direct comparison with the distribution per 2010, which included both taxa as subspecies. Additionally, all of Belarus was missing in the 2010 data. However, according to Dijkstra & Lewington [47] this is erroneous, and that area has thus been added to the range of the species in 2010.

#### *Trithemis festiva*

No distribution map for this species was included in Askew [45] but in the text it was noted as occurring on Rhodes and Cyprus and we have added this area to the range per 1988. In 2010 it also occurs in a small area within our study area in southern Turkey.

### 3) SPECIES WHICH IN 2010 HAVE BEEN INCLUDED AS NEW IN EUROPE

#### *Ischnura fountaineae*

No distribution map for this species was included in Askew [45], and within Europe it currently occurs only on the Italian island Pantelleria southwest of Sicily [12,47].

#### *Orthetrum Sabina*

No distribution map for this species was included in Askew [45] and the text states that it does not penetrate into Europe west of the Caucasus. However, it is included both in Dijkstra & Lewington [47] and Kalkman et al. [12] with a range along the Turkish Mediterranean coast and some Greek islands.

#### *Orthetrum taeniolatum*

No distribution map for this species was included in Askew [45] and the text states that its distribution only very nearly extends into Europe. However, it is included both in Dijkstra & Lewington [47] and Kalkman et al. [12] with a range along the Turkish Mediterranean coast and some Greek islands.

#### *Trithemis kirbyi*

No distribution map for this species was included in Askew [45] and it does not seem to occur within our study area per 2006 [47]. However, by 2010 it has jumped from North Africa to Sardinia [12].

### 4) SPECIES WITH CHANGES IN TAXONOMY AND SCIENTIFIC NAME

#### *Brachythemis impartita*

The taxon *B. leucosticta* included in Askew [45] was believed to feature two morphotypes, which are now considered to represent separate species where *B. impartita* is the one found in Europe [47] and thus the one included in this work.

#### *Chalcolestes viridis* / *Chalcolestes parvidens*

*C. parvidens* used to be considered a subspecies of *C. viridis* and both were thus included in the same distribution map in 1988 [45]. They were both formerly in the genus *Lestes*.

#### *Ceriatron tenellum* / *Ceriatron georgifreyi*

*C. georgifreyi* used to be considered a subspecies of *C. tenellum* and both were thus included in the same distribution map in 1988 [45].

#### *Sympetrum sinaiticum*

Previously incorrectly called *S. decoloratum* and the individuals in Europe treated as the subspecies *S. d. sinaiticum* [45], but according to Dijkstra & Lewington [47] *S. sinaiticum* is now considered a good species on its own.

#### *Sympetrum vulgatum decoloratum*

*S. decoloratum* used to be considered a good species which included *sinaiticum* as a subspecies [45], but according to Dijkstra & Lewington [47] *decoloratum* is now considered to be a subspecies of *S. vulgatum* and *sinaiticum* a good species on its own. *S. v. decoloratum* occurs in Turkey where nominate form *S. vulgatum* on the other hand does not occur and *decoloratum* is thus included

within the distribution maps of *Sympetrum vulgatum* from both 1988 and 2010. The distribution map *decolora* only includes the North African range which was believed to be the subspecies *Sympetrum decoloratum sinaiticum*, whereas *Sympetrum vulgatum* was considered to be the one occurring in Turkey. There is no specific distribution map available for *decoloratum* in 2010 where its Turkish range is included within the *Sympetrum vulgatum* range.

**Table S2** Table showing the taxonomic suborder and scientific names of all European dragonfly (Odonata) species included in the analysis ( $n = 123$ ) of how species groups with different habitat adaptations react to climatic change. Also presented are overall range size expressed as number of occupied  $100 \times 100$  km grid cells and latitudinal range expressed as the latitudinal extent of distributional range between northern and southern range borders in 1988 and 2010, respectively; range shift between 1988 and 2010 expressed as change in latitudinal range and shift in northern range margin; and ecological habitat category for each species classified according to references as permanent running (perennial lotic) water (LOT), permanent standing (perennial lentic) water (PER), and temporary (running or standing) water (TEM). See methods for detailed descriptions of the entries on species range in this table. Nomenclature and taxonomy follow IUCN [48].

| SUBORDER  | SPECIES                           | OVERALL RANGE<br>1988<br>(Number of grid cells) | OVERALL RANGE<br>2010<br>(Number of grid cells) | LATITUDINAL RANGE<br>1988<br>(km) | LATITUDINAL RANGE<br>2010<br>(km) | RANGE SHIFT<br>Latitudinal<br>(km) | RANGE SHIFT<br>North border<br>(km) | HABITAT CATEGORY<br>(Type) | HABITAT UTILIZA-<br>TION<br>(Reference) |
|-----------|-----------------------------------|-------------------------------------------------|-------------------------------------------------|-----------------------------------|-----------------------------------|------------------------------------|-------------------------------------|----------------------------|-----------------------------------------|
| Zygoptera | <i>Calopteryx haemorrhoidalis</i> | 158                                             | 172                                             | 1034                              | 1165                              | 130                                | 130                                 | LOT                        | [27,47,50]                              |
| Zygoptera | <i>Calopteryx splendens</i>       | 596                                             | 644                                             | 3255                              | 3259                              | 4                                  | 4                                   | LOT                        | [27,47,50]                              |
| Zygoptera | <i>Calopteryx virgo</i>           | 748                                             | 803                                             | 3836                              | 3796                              | -40                                | -62                                 | LOT                        | [27,47,50]                              |
| Zygoptera | <i>Calopteryx xanthostoma</i>     | 127                                             | 121                                             | 1274                              | 1229                              | -46                                | -45                                 | LOT                        | [27,47,50]                              |
| Zygoptera | <i>Ceriagrion georgifreyi</i>     | 6                                               | 7                                               | 106                               | 408                               | 302                                | 299                                 | LOT                        | [27,47,50]                              |
| Zygoptera | <i>Ceriagrion tenellum</i>        | 283                                             | 318                                             | 2041                              | 2267                              | 226                                | 226                                 | PER                        | [27,47,50]                              |
| Zygoptera | <i>Chalcolestes viridis</i>       | 507                                             | 547                                             | 2041                              | 2331                              | 290                                | 290                                 | TEM                        | [27,52]                                 |
| Zygoptera | <i>Coenagrion armatum</i>         | 292                                             | 321                                             | 2369                              | 2493                              | 124                                | 236                                 | PER                        | [27,47,50]                              |
| Zygoptera | <i>Coenagrion caerulescens</i>    | 125                                             | 140                                             | 912                               | 933                               | 21                                 | 21                                  | LOT                        | [27,47,50]                              |
| Zygoptera | <i>Coenagrion hastulatum</i>      | 480                                             | 482                                             | 3186                              | 3189                              | 3                                  | -9                                  | PER                        | [27,47,50]                              |
| Zygoptera | <i>Coenagrion hylas</i>           | 2                                               | 2                                               | 75                                | 75                                | 0                                  | 0                                   | PER                        | [47,50]                                 |
| Zygoptera | <i>Coenagrion intermedium</i>     | 6                                               | 6                                               | 64                                | 63                                | -1                                 | -1                                  | LOT                        | [47,50]                                 |
| Zygoptera | <i>Coenagrion johanssoni</i>      | 157                                             | 197                                             | 1445                              | 1676                              | 232                                | 0                                   | PER                        | [45,47,50]                              |
| Zygoptera | <i>Coenagrion lunulatum</i>       | 403                                             | 393                                             | 2890                              | 3012                              | 122                                | 37                                  | PER                        | [45,47,50]                              |
| Zygoptera | <i>Coenagrion mercuriale</i>      | 229                                             | 243                                             | 1968                              | 1909                              | -59                                | -46                                 | LOT                        | [27,47,50]                              |
| Zygoptera | <i>Coenagrion ornatum</i>         | 147                                             | 280                                             | 1480                              | 2214                              | 734                                | 520                                 | LOT                        | [45,47,50]                              |
| Zygoptera | <i>Coenagrion puella</i>          | 646                                             | 703                                             | 2884                              | 3004                              | 120                                | 97                                  | PER                        | [27,47,50]                              |
| Zygoptera | <i>Coenagrion pulchellum</i>      | 589                                             | 631                                             | 3172                              | 3409                              | 237                                | 122                                 | PER                        | [27,47,50]                              |
| Zygoptera | <i>Coenagrion scitulum</i>        | 155                                             | 345                                             | 1924                              | 1926                              | 2                                  | 2                                   | PER                        | [47,50]                                 |
| Zygoptera | <i>Enallagma cyathigerum</i>      | 761                                             | 833                                             | 3802                              | 3858                              | 56                                 | -97                                 | PER                        | [27,47,50]                              |

|            |                                |     |     |      |      |      |      |     |               |
|------------|--------------------------------|-----|-----|------|------|------|------|-----|---------------|
| Zygoptera  | <i>Epallage fatime</i>         | 55  | 61  | 1249 | 802  | -448 | -526 | LOT | [27,47,50]    |
| Zygoptera  | <i>Erythromma lindenii</i>     | 316 | 404 | 1908 | 2066 | 158  | 158  | PER | [27,47,50]    |
| Zygoptera  | <i>Erythromma najas</i>        | 506 | 587 | 3102 | 3341 | 239  | 2    | PER | [27,47,50]    |
| Zygoptera  | <i>Erythromma viridulum</i>    | 369 | 552 | 1879 | 2302 | 423  | 350  | PER | [47,50]       |
| Zygoptera  | <i>Ischnura elegans</i>        | 666 | 734 | 3386 | 3516 | 129  | 129  | TEM | [27]          |
| Zygoptera  | <i>Ischnura fountaineae</i>    | 0   | 1   | 0    | 12   | 12   | NA   | TEM | [48,54]       |
| Zygoptera  | <i>Ischnura genei</i>          | 23  | 23  | 783  | 783  | 0    | 0    | PER | [47,50]       |
| Zygoptera  | <i>Ischnura graellsii</i>      | 74  | 77  | 885  | 885  | 0    | 0    | TEM | [27]          |
| Zygoptera  | <i>Ischnura pumilio</i>        | 461 | 612 | 2803 | 2854 | 51   | 51   | TEM | [27,47,50]    |
| Zygoptera  | <i>Lestes barbarus</i>         | 542 | 579 | 2241 | 2465 | 224  | 224  | TEM | [27,47,50]    |
| Zygoptera  | <i>Lestes dryas</i>            | 604 | 658 | 3302 | 3488 | 186  | 129  | TEM | [27,47,50]    |
| Zygoptera  | <i>Lestes macrostigma</i>      | 221 | 185 | 1405 | 1599 | 194  | 172  | TEM | [51,55]       |
| Zygoptera  | <i>Lestes sponsa</i>           | 596 | 673 | 3027 | 3218 | 191  | 118  | TEM | [27]          |
| Zygoptera  | <i>Lestes virens</i>           | 450 | 590 | 2106 | 2628 | 521  | 503  | TEM | [27,48,52]    |
| Zygoptera  | <i>Nehalennia speciosa</i>     | 229 | 224 | 1884 | 1804 | -79  | 13   | PER | [27,47,50]    |
| Zygoptera  | <i>Platycnemis acutipennis</i> | 127 | 134 | 1445 | 1445 | 0    | 0    | LOT | [27,47,50]    |
| Zygoptera  | <i>Platycnemis latipes</i>     | 115 | 102 | 1259 | 1007 | -252 | -252 | LOT | [47,50]       |
| Zygoptera  | <i>Platycnemis pennipes</i>    | 628 | 624 | 3384 | 3371 | -13  | 81   | LOT | [27,47,50]    |
| Zygoptera  | <i>Pyrrhosoma nymphula</i>     | 717 | 757 | 3391 | 3403 | 12   | 12   | PER | [27,47,50]    |
| Zygoptera  | <i>Sympecma fusca</i>          | 576 | 562 | 2477 | 2743 | 267  | 267  | PER | [27,47,50]    |
| Zygoptera  | <i>Sympecma paedisca</i>       | 178 | 216 | 1476 | 1896 | 419  | 474  | PER | [27,47,50]    |
| Anisoptera | <i>Aeshna affinis</i>          | 349 | 575 | 1759 | 2394 | 636  | 562  | TEM | [27,47,49,52] |
| Anisoptera | <i>Aeshna caerulea</i>         | 263 | 283 | 2941 | 2913 | -28  | 0    | PER | [27,47,49]    |
| Anisoptera | <i>Aeshna crenata</i>          | 23  | 50  | 372  | 1118 | 745  | 229  | PER | [47,49]       |
| Anisoptera | <i>Aeshna cyanea</i>           | 616 | 611 | 3009 | 3024 | 15   | 15   | PER | [27,47,49]    |
| Anisoptera | <i>Aeshna grandis</i>          | 498 | 556 | 3107 | 3070 | -37  | -63  | PER | [27,47,49]    |
| Anisoptera | <i>Aeshna isoceles</i>         | 436 | 578 | 2386 | 3176 | 790  | 777  | PER | [27,47,49]    |
| Anisoptera | <i>Aeshna juncea</i>           | 553 | 593 | 3426 | 3321 | -106 | -37  | PER | [27,47,49]    |
| Anisoptera | <i>Aeshna mixta</i>            | 542 | 657 | 2152 | 2918 | 765  | 670  | PER | [27,47,49]    |
| Anisoptera | <i>Aeshna serrata</i>          | 58  | 70  | 836  | 987  | 151  | 119  | PER | [47,49]       |
| Anisoptera | <i>Aeshna subarctica</i>       | 291 | 358 | 2945 | 2986 | 42   | -72  | PER | [27,47,49]    |
| Anisoptera | <i>Aeshna viridis</i>          | 235 | 257 | 1785 | 1988 | 203  | 42   | PER | [27,47,49]    |
| Anisoptera | <i>Anax imperator</i>          | 555 | 645 | 2200 | 2655 | 455  | 477  | TEM | [27,54]       |
| Anisoptera | <i>Anax parthenope</i>         | 379 | 524 | 1850 | 2657 | 806  | 806  | TEM | [27,54]       |
| Anisoptera | <i>Boyeria cretensis</i>       | 3   | 6   | 46   | 63   | 18   | 3    | LOT | [47,49]       |
| Anisoptera | <i>Boyeria irene</i>           | 136 | 189 | 1294 | 1445 | 151  | 151  | LOT | [27,47,49]    |
| Anisoptera | <i>Brachythemis impartita</i>  | 25  | 43  | 779  | 833  | 54   | -4   | PER | [27,47,49]    |
| Anisoptera | <i>Brachytron pratense</i>     | 524 | 586 | 2864 | 2997 | 133  | 32   | PER | [27,47,49]    |
| Anisoptera | <i>Caliaeschna microstigma</i> | 74  | 89  | 988  | 906  | -82  | -62  | LOT | [47,49]       |
| Anisoptera | <i>Cordulegaster bidentata</i> | 135 | 253 | 1598 | 1699 | 101  | 149  | LOT | [27,47,49]    |
| Anisoptera | <i>Cordulegaster boltonii</i>  | 527 | 483 | 3165 | 3281 | 116  | 116  | LOT | [27,47,49]    |
| Anisoptera | <i>Cordulegaster helladica</i> | 5   | 12  | 107  | 301  | 194  | 32   | LOT | [47,49]       |

|            |                                 |     |     |      |      |      |      |     |               |
|------------|---------------------------------|-----|-----|------|------|------|------|-----|---------------|
| Anisoptera | <i>Cordulegaster heros</i>      | 15  | 83  | 941  | 1173 | 232  | 82   | LOT | [47,49]       |
| Anisoptera | <i>Cordulegaster insignis</i>   | 57  | 47  | 1275 | 815  | -459 | -459 | LOT | [47,49]       |
| Anisoptera | <i>Cordulegaster picta</i>      | 38  | 45  | 905  | 729  | -176 | -294 | LOT | [47,49]       |
| Anisoptera | <i>Cordulegaster trinacriae</i> | 20  | 21  | 627  | 572  | -55  | -8   | LOT | [47,49]       |
| Anisoptera | <i>Cordulia aenea</i>           | 492 | 629 | 3110 | 3433 | 324  | 219  | PER | [27,47,49]    |
| Anisoptera | <i>Crocothemis erythraea</i>    | 372 | 537 | 1849 | 2152 | 304  | 326  | TEM | [27,47,49,54] |
| Anisoptera | <i>Diplacodes lefebvrii</i>     | 22  | 32  | 523  | 533  | 10   | 11   | TEM | [48,53,54]    |
| Anisoptera | <i>Epithea bimaculata</i>       | 263 | 330 | 2208 | 2242 | 35   | -45  | PER | [27,47,49]    |
| Anisoptera | <i>Gomphus flavipes</i>         | 280 | 344 | 2006 | 2461 | 456  | 651  | LOT | [27,47,49]    |
| Anisoptera | <i>Gomphus graslinii</i>        | 22  | 62  | 1118 | 1297 | 179  | 106  | LOT | [47,49]       |
| Anisoptera | <i>Gomphus pulchellus</i>       | 153 | 184 | 1784 | 1840 | 55   | 55   | PER | [47,49]       |
| Anisoptera | <i>Gomphus schneiderii</i>      | 46  | 63  | 797  | 816  | 19   | 0    | LOT | [47,49]       |
| Anisoptera | <i>Gomphus simillimus</i>       | 128 | 142 | 1651 | 1457 | -194 | -194 | LOT | [47,49]       |
| Anisoptera | <i>Gomphus vulgatissimus</i>    | 446 | 562 | 2718 | 2992 | 274  | 105  | LOT | [27,47,49]    |
| Anisoptera | <i>Leucorrhinia albifrons</i>   | 242 | 220 | 2104 | 2429 | 325  | 61   | PER | [47,49]       |
| Anisoptera | <i>Leucorrhinia caudalis</i>    | 255 | 309 | 2112 | 2367 | 255  | -72  | PER | [27,47,49]    |
| Anisoptera | <i>Leucorrhinia dubia</i>       | 463 | 488 | 3271 | 3166 | -105 | -73  | PER | [27,47,49]    |
| Anisoptera | <i>Leucorrhinia pectoralis</i>  | 232 | 382 | 2439 | 2724 | 285  | 61   | PER | [27,47,49]    |
| Anisoptera | <i>Leucorrhinia rubicunda</i>   | 353 | 378 | 2773 | 2744 | -29  | 15   | PER | [47,49]       |
| Anisoptera | <i>Libellula depressa</i>       | 680 | 706 | 3048 | 3102 | 54   | -3   | TEM | [27]          |
| Anisoptera | <i>Libellula fulva</i>          | 483 | 573 | 2878 | 3100 | 222  | 153  | PER | [27,47,49]    |
| Anisoptera | <i>Libellula quadrimaculata</i> | 675 | 738 | 3685 | 3411 | -274 | -283 | PER | [27,47,49]    |
| Anisoptera | <i>Lindenia tetraphylla</i>     | 75  | 59  | 954  | 886  | -68  | 30   | PER | [47,49]       |
| Anisoptera | <i>Macromia splendens</i>       | 23  | 50  | 910  | 1030 | 120  | 64   | PER | [47,49]       |
| Anisoptera | <i>Onychogomphus costae</i>     | 16  | 32  | 338  | 695  | 357  | 192  | TEM | [47]          |
| Anisoptera | <i>Onychogomphus forcipatus</i> | 504 | 608 | 3290 | 3462 | 172  | 172  | LOT | [27,47,49]    |
| Anisoptera | <i>Onychogomphus uncatus</i>    | 135 | 157 | 1481 | 1435 | -46  | -104 | LOT | [27,47,49]    |
| Anisoptera | <i>Ophiogomphus cecilia</i>     | 331 | 342 | 2686 | 2854 | 168  | -62  | LOT | [27,47,49]    |
| Anisoptera | <i>Orthetrum albistylum</i>     | 220 | 302 | 1678 | 2082 | 404  | 404  | TEM | [27]          |
| Anisoptera | <i>Orthetrum brunneum</i>       | 431 | 515 | 1955 | 2304 | 349  | 349  | LOT | [27,47,49]    |
| Anisoptera | <i>Orthetrum cancellatum</i>    | 666 | 731 | 3159 | 3128 | -31  | -31  | TEM | [27]          |
| Anisoptera | <i>Orthetrum chrysostigma</i>   | 26  | 60  | 356  | 707  | 351  | 351  | TEM | [27,54]       |
| Anisoptera | <i>Orthetrum coerulescens</i>   | 552 | 604 | 2947 | 3086 | 139  | 139  | LOT | [27,47,49]    |
| Anisoptera | <i>Orthetrum nitidinerve</i>    | 33  | 79  | 609  | 811  | 202  | 202  | PER | [47,49]       |
| Anisoptera | <i>Orthetrum sabina</i>         | 0   | 16  | 0    | 347  | 347  | NA   | TEM | [27,53]       |
| Anisoptera | <i>Orthetrum taeniolatum</i>    | 0   | 18  | 0    | 436  | 436  | NA   | PER | [47,49]       |
| Anisoptera | <i>Orthetrum trinacria</i>      | 14  | 50  | 437  | 715  | 278  | 127  | TEM | [48]          |
| Anisoptera | <i>Oxygastra curtisii</i>       | 154 | 148 | 1842 | 1509 | -333 | -372 | LOT | [47,49]       |
| Anisoptera | <i>Pantala flavescens</i>       | 2   | 14  | 48   | 752  | 704  | 498  | TEM | [27,45,49,54] |
| Anisoptera | <i>Paragomphus genei</i>        | 27  | 36  | 591  | 617  | 27   | 27   | TEM | [27,47,49,54] |
| Anisoptera | <i>Selysiothemis nigra</i>      | 38  | 120 | 815  | 1464 | 648  | 626  | TEM | [48,54]       |
| Anisoptera | <i>Somatochlora alpestris</i>   | 179 | 211 | 3085 | 3070 | -15  | -9   | PER | [27,47,49]    |

|            |                                   |     |     |      |      |     |     |     |            |
|------------|-----------------------------------|-----|-----|------|------|-----|-----|-----|------------|
| Anisoptera | <i>Somatochlora arctica</i>       | 283 | 399 | 3162 | 3186 | 24  | 31  | PER | [27,47,49] |
| Anisoptera | <i>Somatochlora flavomaculata</i> | 358 | 524 | 2664 | 3258 | 594 | 432 | PER | [27,47,49] |
| Anisoptera | <i>Somatochlora meridionalis</i>  | 72  | 138 | 972  | 1486 | 514 | 393 | LOT | [47,49]    |
| Anisoptera | <i>Somatochlora metallica</i>     | 584 | 588 | 3232 | 3282 | 50  | -84 | PER | [27,47,49] |
| Anisoptera | <i>Somatochlora sahlbergi</i>     | 9   | 11  | 202  | 284  | 82  | 12  | PER | [27,47,49] |
| Anisoptera | <i>Sympetrum danae</i>            | 529 | 554 | 2840 | 2895 | 55  | 53  | TEM | [47]       |
| Anisoptera | <i>Sympetrum depressiusculum</i>  | 143 | 314 | 1531 | 2500 | 969 | 782 | TEM | [27,47,49] |
| Anisoptera | <i>Sympetrum flaveolum</i>        | 632 | 669 | 3154 | 3291 | 137 | 129 | TEM | [27,47,49] |
| Anisoptera | <i>Sympetrum fonscolombii</i>     | 443 | 588 | 2397 | 2441 | 44  | 46  | TEM | [27,49,54] |
| Anisoptera | <i>Sympetrum meridionale</i>      | 373 | 543 | 1895 | 2106 | 211 | 211 | TEM | [52,53]    |
| Anisoptera | <i>Sympetrum pedemontanum</i>     | 168 | 310 | 1726 | 2107 | 381 | 533 | TEM | [48,51]    |
| Anisoptera | <i>Sympetrum sanguineum</i>       | 631 | 693 | 2887 | 2902 | 15  | 44  | TEM | [27,47,49] |
| Anisoptera | <i>Sympetrum sinaiticum</i>       | 4   | 23  | 55   | 571  | 516 | 70  | TEM | [54]       |
| Anisoptera | <i>Sympetrum striolatum</i>       | 718 | 740 | 3313 | 3330 | 17  | 39  | TEM | [27,49]    |
| Anisoptera | <i>Sympetrum vulgatum</i>         | 475 | 545 | 3187 | 3343 | 156 | 95  | TEM | [27,49]    |
| Anisoptera | <i>Trithemis annulata</i>         | 69  | 169 | 691  | 1164 | 473 | 378 | TEM | [54]       |
| Anisoptera | <i>Trithemis festiva</i>          | 3   | 7   | 70   | 262  | 192 | 192 | LOT | [47]       |
| Anisoptera | <i>Trithemis kirbyi</i>           | 0   | 5   | 0    | 216  | 216 | NA  | TEM | [27,54]    |
| Anisoptera | <i>Zygonyx torridus</i>           | 6   | 19  | 261  | 363  | 102 | 64  | LOT | [45,47]    |

**Table S3** Measures of range size in European dragonfly (Odonata) species in 1988 and 2010, respectively. Overall range size is expressed as number of occupied 100 × 100 km grid cells whereas latitudinal range is expressed as the latitudinal extent of distributional range between northern and southern range borders. Ecological habitat category: Permanent running (perennial lotic) water, permanent standing (perennial lentic) water, and temporary (running or standing) water used in two-way combinations as three unmatched test groups in Mann-Whitney-Wilcoxon tests. Bold font indicates significant variables at  $\alpha = 0.05$

|                                    | Data set | Perm. Running |             | Perm. Standing |             | Temporary |             | Perm. Running–Perm. Standing |    |     |               | Perm. Running–Temporary |    |     |               | Perm. Standing–Temporary |    |      |               |
|------------------------------------|----------|---------------|-------------|----------------|-------------|-----------|-------------|------------------------------|----|-----|---------------|-------------------------|----|-----|---------------|--------------------------|----|------|---------------|
|                                    |          | n             | Mean ± 1 SD | n              | Mean ± 1 SD | n         | Mean ± 1 SD | n                            | df | W   | p-value       | n                       | df | W   | p-value       | n                        | df | W    | p-value       |
| Overall range<br>(number of cells) | 1988     | 37            | 194 ± 211   | 48             | 325 ± 216   | 34        | 315 ± 257   | 85                           | 1  | 566 | <b>0.0030</b> | 71                      | 1  | 533 | 0.1025        | 82                       | 1  | 938  | 0.7902        |
|                                    | 2010     | 37            | 224 ± 225   | 49             | 375 ± 233   | 37        | 383 ± 278   | 86                           | 1  | 572 | <b>0.0035</b> | 74                      | 1  | 488 | <b>0.0341</b> | 86                       | 1  | 887  | 0.8649        |
| Latitudinal range<br>(km)          | 1988     | 37            | 1514 ± 1040 | 48             | 2214 ± 1026 | 34        | 1717 ± 1154 | 85                           | 1  | 580 | <b>0.0044</b> | 71                      | 1  | 613 | 0.4427        | 82                       | 1  | 1141 | <b>0.0412</b> |
|                                    | 2010     | 37            | 1578 ± 1071 | 49             | 2373 ± 991  | 37        | 1996 ± 1096 | 86                           | 1  | 545 | <b>0.0016</b> | 74                      | 1  | 552 | 0.1520        | 86                       | 1  | 1093 | 0.1047        |

**Table S4** Measures of range shift in European dragonfly (Odonata) species between 1988 and 2010. Shift in latitudinal range is expressed as the change in latitudinal extent of distributional range, and shift in northern range border is expressed as the change in maximum latitude of distributional range for all species, whereas the subset of species experiencing range contraction used to express contraction in latitudinal range and north border, respectively. Ecological habitat category: Permanent running (perennial lotic) water, permanent standing (perennial lentic) water, and temporary (running or standing) water used in two-way combinations as three unmatched test groups in Mann-Whitney-Wilcoxon tests. Bold font indicates significant variables at  $\alpha = 0.05$

|                                       | Perm. Running |             | Perm. Standing |             | Temporary |             | Perm. Running–Perm. Standing |    |     |         | Perm. Running–Temporary |    |     |               | Perm. Standing–Temporary |    |     |               |
|---------------------------------------|---------------|-------------|----------------|-------------|-----------|-------------|------------------------------|----|-----|---------|-------------------------|----|-----|---------------|--------------------------|----|-----|---------------|
|                                       | n             | Mean ± 1 SD | n              | Mean ± 1 SD | n         | Mean ± 1 SD | n                            | df | W   | p-value | n                       | df | W   | p-value       | n                        | df | W   | p-value       |
| Shift in latitudinal range (km)       | 37            | 64 ± 243    | 49             | 159 ± 226   | 37        | 279 ± 250   | 86                           | 1  | 711 | 0.0890  | 74                      | 1  | 349 | <b>0.0003</b> | 86                       | 1  | 632 | <b>0.0169</b> |
| Shift in north border (km)            | 37            | 34 ± 239    | 48             | 91 ± 192    | 34        | 246 ± 234   | 85                           | 1  | 805 | 0.4618  | 71                      | 1  | 326 | <b>0.0005</b> | 82                       | 1  | 439 | <b>0.0004</b> |
| Contraction in latitudinal range (km) | 14            | -157 ± 158  | 9              | -82 ± 79    | 1         | -31         | 23                           | 1  | 49  | 0.3950  | 15                      | 1  | 2   | 0.2972        | 10                       | 1  | 3   | 0.8000        |
| Contraction in north border (km)      | 14            | -178 ± 175  | 12             | -71 ± 74    | 2         | -17 ± 20    | 26                           | 1  | 62  | 0.2573  | 16                      | 1  | 3   | 0.0945        | 14                       | 1  | 3   | 0.1199        |
